# Supplementary material
Source: PubMed Central journal article supplement (PMC5710328)
Supplement: jamaneurol-74-992-s001.pdf [file jamaneurol-74-992-s001.pdf]

## Supplementary Online Content

Noguchi E, Uruha A, Suzuki S, et al. Skeletal muscle involvement in antisynthetase syndrome. *JAMA Neurol*. Published online June 5, 2017. doi:10.1001/jamaneurol.2017.0934

**eTable 1.** *HLA-DRB1* alleles in patients with antisynthetase syndrome and healthy individuals

**eTable 2.** Comparison between patients with and without anti-OJ antibodies

This supplementary material has been provided by the authors to give readers additional information about their work.

**eTable 1. HLA-DRB1 alleles in patients with antisynthetase syndrome and healthy individuals**

| HLA        | All anti-ARS<br>(allele N=96)<br>N (%) | Anti-Jo-1<br>(allele N=30)<br>N (%) | Anti-OJ<br>(allele N=22)<br>N (%) | Anti-PL-7<br>(allele N=24)<br>N (%) | Control<br>(allele N=920)<br>N (%) |
|------------|----------------------------------------|-------------------------------------|-----------------------------------|-------------------------------------|------------------------------------|
| DRB1*01:01 | 6 (6%)                                 | 2 (7%)                              | 0 (0%)                            | 4 (17%)                             | 58 (6%)                            |
| DRB1*03:01 | 1 (1%)                                 | 0 (0%)                              | 1 (5%)                            | 0 (0%)                              | 1 (0%)                             |
| DRB1*04:01 | 0 (0%)                                 | 0 (0%)                              | 0 (0%)                            | 0 (0%)                              | 11 (1%)                            |
| DRB1*04:03 | 1 (1%)                                 | 1 (3%)                              | 0 (0%)                            | 0 (0%)                              | 23 (3%)                            |
| DRB1*04:05 | 12 (13%)                               | 5 (17%)                             | 2 (9%)                            | 3 (13%)                             | 103 (11%)                          |
| DRB1*04:06 | 3 (3%)                                 | 0 (0%)                              | 1 (5%)                            | 0 (0%)                              | 33 (4%)                            |
| DRB1*04:07 | 1 (1%)                                 | 0 (0%)                              | 0 (0%)                            | 0 (0%)                              | 5 (5%)                             |
| DRB1*04:10 | 2 (2%)                                 | 0 (0%)                              | 0 (0%)                            | 2 (8%)                              | 14 (2%)                            |
| DRB1*07:01 | 0 (0%)                                 | 0 (0%)                              | 0 (0%)                            | 0 (0%)                              | 1 (0%)                             |
| DRB1*08:02 | 7 (7%)                                 | 4 (13%)                             | 0 (0%)                            | 2 (8%)                              | 53 (6%)                            |
| DRB1*08:03 | 10 (10%)                               | 3 (10%)                             | 2 (9%)                            | 4 (17%)                             | 71 (6%)                            |
| DRB1*09:01 | 10 (10%)                               | 2 (7%)                              | 4 (18%)                           | 3 (13%)                             | 128 (14%)                          |
| DRB1*10:01 | 0 (0%)                                 | 0 (0%)                              | 0 (0%)                            | 0 (0%)                              | 2 (0%)                             |
| DRB1*11:01 | 4 (4%)                                 | 2 (7%)                              | 1 (5%)                            | 1 (4%)                              | 23 (3%)                            |
| DRB1*12:01 | 1 (1%)                                 | 1 (3%)                              | 0 (0%)                            | 0 (0%)                              | 32 (3%)                            |
| DRB1*12:02 | 2 (2%)                                 | 0 (0%)                              | 2 (9%)                            | 0 (0%)                              | 19 (2%)                            |
| DRB1*13:01 | 0 (0%)                                 | 0 (0%)                              | 0 (0%)                            | 0 (0%)                              | 3 (0%)                             |
| DRB1*13:02 | 3 (3%)                                 | 1 (3%)                              | 0 (0%)                            | 0 (0%)                              | 68 (7%)                            |
| DRB1*13:03 | 0 (0%)                                 | 0 (0%)                              | 0 (0%)                            | 0 (0%)                              | 1 (0%)                             |
| DRB1*13:07 | 0 (0%)                                 | 0 (0%)                              | 0 (0%)                            | 0 (0%)                              | 1 (0%)                             |
| DRB1*14:03 | 1 (1%)                                 | 1 (3%)                              | 0 (0%)                            | 0 (0%)                              | 13 (1%)                            |
| DRB1*14:05 | 3 (3%)                                 | 0 (0%)                              | 2 (9%)                            | 1 (4%)                              | 25 (3%)                            |
| DRB1*14:06 | 0 (0%)                                 | 0 (0%)                              | 0 (0%)                            | 0 (0%)                              | 12 (1%)                            |
| DRB1*14:12 | 1 (1%)                                 | 0 (0%)                              | 0 (0%)                            | 0 (0%)                              | 1 (0%)                             |
| DRB1*14:54 | 6 (6%)                                 | 2 (7%)                              | 2 (9%)                            | 0 (0%)                              | 37 (4%)                            |
| DRB1*15:01 | 10 (10%)                               | 1 (3%)                              | 3 (14%)                           | 2 (8%)                              | 62 (7%)                            |
| DRB1*15:02 | 10 (10%)                               | 4 (13%)                             | 2 (9%)                            | 2 (8%)                              | 114 (12%)                          |
| DRB1*16:02 | 2 (2%)                                 | 1 (3%)                              | 0 (0%)                            | 0 (0%)                              | 6 (1%)                             |

ARS, aminoacyl transfer RNA synthetase; HLA, human leukocyte antigen

**eTable 2.** Comparison between patients with and without anti-OJ antibodies

|                                                    | Anti-OJ<br>(N=14)<br>N (%) | Non-anti-OJ<br>(N=37)<br>N (%) | p value |
|----------------------------------------------------|----------------------------|--------------------------------|---------|
| Number of women                                    | 7 (50%)                    | 24 (65%)                       | 0.36    |
| Age at disease onset (yrs)                         | 67.7 ± 12.8                | 57.4 ± 16.5                    | 0.04    |
| Disease progression                                |                            |                                |         |
| Subacute                                           | 13 (93%)                   | 33 (89%)                       | 0.69    |
| Chronic                                            | 1 (7%)                     | 4 (11%)                        | 0.69    |
| Risk factors                                       |                            |                                |         |
| Antecedent infection                               | 3 (21%)                    | 7 (19%)                        | 1.00    |
| Statin                                             | 0 (0%)                     | 1 (3%)                         | 0.53    |
| Cancer                                             | 3 (21%)                    | 3 (8%)                         | 0.19    |
| Systemic autoimmune disease                        | 1 (7%)                     | 7 (19%)                        | 0.30    |
| Muscle weakness                                    |                            |                                |         |
| Severe limb muscle weakness                        | 8 (57%)                    | 6 (16%)                        | 0.01    |
| Neck muscle weakness                               | 8 (57%)                    | 9 (24%)                        | 0.04    |
| Dysphagia                                          | 8 (57%)                    | 7 (19%)                        | 0.01    |
| Respiratory muscle involvement                     | 1 (7%)                     | 5 (14%)                        | 0.33    |
| Muscle atrophy                                     | 8 (57%)                    | 7 (19%)                        | 0.01    |
| Myalgia                                            | 7 (50%)                    | 8 (22%)                        | 0.05    |
| Extramuscular symptoms                             |                            |                                |         |
| Fever                                              | 7 (50%)                    | 13 (35%)                       | 0.33    |
| Skin rash                                          | 8 (57%)                    | 26 (70%)                       | 0.37    |
| Arthropathy                                        | 4 (29%)                    | 17 (46%)                       | 0.26    |
| Raynaud phenomenon                                 | 0 (0%)                     | 4 (11%)                        | 0.20    |
| Interstitial lung disease                          | 12 (86%)                   | 29 (78%)                       | 0.56    |
| Blood examination                                  |                            |                                |         |
| Creatine kinase (IU/L)                             | 6207 ± 6612                | 3561 ± 4169                    | 0.09    |
| Histological findings                              |                            |                                |         |
| Myofiber necrosis in perifascicular regions        | 6/13 (46%)                 | 18/37 (49%)                    | 1.00    |
| Diffuse myofiber necrosis                          | 5/13 (38%)                 | 3/37 (8%)                      | 0.03    |
| MHC class I expression                             | 11/13 (85%)                | 30/37 (81%)                    | 1.00    |
| MHC class I enhancement in perifascicular regions  | 3/13 (23%)                 | 9/37 (24%)                     | 1.00    |
| MHC class II expression                            | 7/13 (54%)                 | 12/37 (32%)                    | 0.50    |
| MHC class II enhancement in perifascicular regions | 7/13 (54%)                 | 9/37 (24%)                     | 0.30    |

MHC; major histocompatibility complex
